# Supplementary material for: Macrophage-derived extracellular vesicles regulate skeletal stem/progenitor Cell lineage fate and bone deterioration in obesity
Source: PubMed Central journal article supplement — Bioact Mater. 2024 Jul 4;36:508–23. doi: 10.1016/j.bioactmat.2024.06.035 (PMC11282946; doi:10.1016/j.bioactmat.2024.06.035), 2024-07-04
Supplement: mmc1.pdf [file mmc1.pdf]

Supplemental Table S1

| Primer                                  | Forward primer (5' to 3') | Reverse primer (5' to 3') |
|-----------------------------------------|---------------------------|---------------------------|
| <i><math>\beta</math>-actin</i> (mouse) | GGCTGTATTCCCCTCCATCG      | CCAGTTGGTAACAATGCCATGT    |
| <i>Ppar-g</i> (mouse)                   | ATGGTTGACACAGAGATGC       | GAATGCGAGTGGTCTTCC        |
| <i>Fabp4</i> (mouse)                    | AAGGTGAAGAGCATCATAACCCT   | TCACGCCTTTCATAACACATTCC   |
| <i>Runx2</i> (mouse)                    | GAAATGCCTCCGCTGTTATG      | AGGTGAAACTCTGCCTCGTC      |
| <i>Alp</i> (mouse)                      | CCCCATGTGATGGCGTAT        | CGGTAGGGAGAGCACAGC        |
| <i>Sp7</i> (mouse)                      | ATGGCGTCCTCTCTGCTTG       | TGAAAGGTCAGCGTATGGCTT     |
| <i>Bgl</i> (mouse)                      | AAGCAGGAGGGCAATAAGGT      | ATGCGTTTGTAGGCGGTCTT      |
| <i>Ppara</i> (mouse)                    | AGAGCCCCATCTGTCCTCTC      | ACTGGTAGTCTGCAAAACCAA     |
